# Supplementary material for: KRAS-G12C Mutation in One Real-Life and Three Population-Based Nordic Cohorts of Metastatic Colorectal Cancer
Source: PubMed Central journal article supplement (PMC8889930; doi:10.3389/fonc.2022.826073), 2022-02-16
Supplement: DataSheet_1.pdf [file DataSheet_1.pdf]

## Supplementary Material

**Supplementary Table 1.** Demographics for the different cohorts included

|                                                 |                                              | All <sup>f</sup> |       | Real-life RAXO<br>2012-2018 |       | Uppsala region<br>2010-2018 |       | PRCRC<br>2003-2006 |       | p-value* |
|-------------------------------------------------|----------------------------------------------|------------------|-------|-----------------------------|-------|-----------------------------|-------|--------------------|-------|----------|
|                                                 |                                              | 2559             | 100 % | 1086                        | 44 %  | 626                         | 26 %  | 798                | 33 %  |          |
| Total                                           |                                              | 2559             | 100 % | 1086                        | 100 % | 626                         | 100 % | 798                | 100 % |          |
| Age groups                                      | ≤70                                          | 1386             | 54 %  | 716                         | 66 %  | 264                         | 42 %  | 376                | 47 %  | <0.001   |
|                                                 | >70                                          | 1173             | 46 %  | 370                         | 34 %  | 362                         | 58 %  | 422                | 53 %  |          |
| Sex                                             | Male                                         | 1430             | 56 %  | 656                         | 60 %  | 331                         | 53 %  | 418                | 52 %  | 0.002    |
|                                                 | Female                                       | 1129             | 44 %  | 430                         | 40 %  | 295                         | 47 %  | 380                | 48 %  |          |
| Primary tumor                                   | Right colon                                  | 839              | 33 %  | 310                         | 29 %  | 235                         | 38 %  | 278                | 36 %  | <0.001   |
|                                                 | Left colon                                   | 836              | 33 %  | 396                         | 37 %  | 172                         | 28 %  | 252                | 33 %  |          |
|                                                 | Rectum                                       | 851              | 34 %  | 374                         | 35 %  | 215                         | 35 %  | 245                | 32 %  |          |
|                                                 | Multiple/unknown                             | 33               | -     | 6                           | -     | 4                           | -     | 23                 | -     |          |
| Primary surgery                                 | No                                           | 756              | 30 %  | 250                         | 23 %  | 272                         | 44 %  | 223                | 28 %  | <0.001   |
|                                                 | Yes                                          | 1803             | 71 %  | 836                         | 77 %  | 354                         | 57 %  | 575                | 72 %  |          |
| Presentation of metastases                      | Synchronous                                  | 1618             | 63 %  | 735                         | 68 %  | 422                         | 68 %  | 433                | 54 %  | <0.001   |
|                                                 | Metachronous                                 | 305              | 12 %  | 351                         | 32 %  | 203                         | 32 %  | 365                | 46 %  |          |
| ECOG Performance status                         | 0                                            | 765              | 30 %  | 295                         | 27 %  | 208                         | 33 %  | 250                | 31 %  | <0.001   |
|                                                 | 1                                            | 1053             | 41 %  | 600                         | 55 %  | 193                         | 31 %  | 232                | 29 %  |          |
|                                                 | 2-4                                          | 732              | 29 %  | 191                         | 18 %  | 220                         | 35 %  | 313                | 39 %  |          |
|                                                 | Missing                                      | 9                | -     | 0                           | -     | 5                           | -     | 3                  | -     |          |
| Type of treatment                               | Any active treatment                         | 2011             | 79 %  | 1063                        | 98 %  | 443                         | 71 %  | 460                | 58 %  | <0.001   |
|                                                 | Metastasectomy and/or LAT ± systemic therapy | 626              | 25 %  | 397                         | 37 %  | 159                         | 25 %  | 49                 | 6 %   | <0.001   |
|                                                 | Systemic therapy only                        | 1385             | 54 %  | 666                         | 61 %  | 284                         | 45 %  | 411                | 52 %  | <0.001   |
|                                                 | Cytotoxics only                              | 563              | 22 %  | 117                         | 11 %  | 175                         | 28 %  | 293                | 37 %  | <0.001   |
|                                                 | Anti-VEGF/Anti-EGFR <sup>§</sup>             | 822              | 32 %  | 549                         | 51 %  | 138                         | 22 %  | 118                | 15 %  | <0.001   |
|                                                 | Best supportive care                         | 548              | 21 %  | 23                          | 2 %   | 183                         | 29 %  | 338                | 42 %  | <0.001   |
| <i>KRAS</i> , <i>NRAS</i> , <i>BRAF</i> testing | Not sufficiently                             | 688              | 27 %  | 167                         | 15 %  | 175                         | 28 %  | 346                | 43 %  | <0.001   |
|                                                 | Accurately analyzed                          | 1871             | 73 %  | 919                         | 85 %  | 451                         | 72 %  | 452                | 57 %  |          |
| Overall survival                                | Median, months (95% CI)                      | 18.9 (17.8-20.1) |       | 30.0 (28.0-32.1)            |       | 15.3 (13.3-17.2)            |       | 9.8 (8.5-11.0)     |       | <0.001   |
|                                                 | 1-year rate                                  | 64 %             |       | 82 %                        |       | 58 %                        |       | 43 %               |       |          |
|                                                 | 3-year rate                                  | 28 %             |       | 42 %                        |       | 24 %                        |       | 11 %               |       |          |
|                                                 | Any active treatment                         | 25.2 (23.8-26.5) |       | 30.6 (28.4-32.8)            |       | 22.8 (20.6-25.0)            |       | 16.2 (14.4-18.1)   |       | <0.001   |
|                                                 | Metastasectomy and/or LAT                    | 67.5 (61.3-73.8) |       | 71.5 (62.8-80.2)            |       | 60.5 (51.1-70.0)            |       | 61.4 (47.9-74.8)   |       | 0.328    |
|                                                 | Systemic therapy only                        | 18.0 (16.9-19.0) |       | 20.8 (19.3-22.3)            |       | 15.0 (13.8-16.1)            |       | 15.1 (13.4-16.8)   |       | <0.001   |
|                                                 | Cytotoxics only                              | 11.3 (10.4-12.3) |       | 10.8 (7.7-13.8)             |       | 11.9 (10.4-13.3)            |       | 10.9 (9.1-12.7)    |       | 0.132    |
|                                                 | Anti-VEGF/Anti-EGFR <sup>§</sup>             | 23.0 (21.5-24.5) |       | 23.2 (21.2-25.2)            |       | 23.9 (20.0-27.8)            |       | 20.7 (17.3-24.1)   |       | 0.782    |
|                                                 | Best supportive care                         | 3.4 (3.0-3.8)    |       | 2.9 (2.6-3.1)               |       | 3.2 (2.7-3.7)               |       | 4.6 (3.3-5.8)      |       | 0.009    |

<sup>§</sup> systemic therapy with anti-VEGF/anti-EGFR but without metastasectomy/LAT.

\* p-value between RAXO, Uppsala Region and PRCRC.

<sup>f</sup> Includes 49 patients from the Finnish population cohort (characteristics presented in Supplementary Table 2. Characteristics of all patients in the Finnish population cohort are not detailed as in the three cohorts presented above).

**Supplementary Table 2.** Demographics for molecularly adequately analyzed tumors in the different cohorts included

|                            |                                              | All              |                  | RAXO             |                  | Uppsala region   |                  | PRCRC             |       | p-value          | KRAS-G12Cmt in Finnish data-collection |       |
|----------------------------|----------------------------------------------|------------------|------------------|------------------|------------------|------------------|------------------|-------------------|-------|------------------|----------------------------------------|-------|
|                            |                                              | 1871             | 100 %            | 919              | 49 %             | 451              | 24 %             | 452               | 24 %  |                  | 49                                     | 3 %   |
| Total                      |                                              | 1871             | 100 %            | 919              | 100 %            | 451              | 100 %            | 452               | 100 % |                  | 49                                     | 100 % |
| Mutation groups            | KRAS-G12Cmt                                  | 103              | 6 %              | 34               | 4 %              | 12               | 3 %              | 8                 | 2 %   | <0.001           | 49                                     | 100 % |
|                            | KRASmt                                       | 881              | 47 %             | 461              | 50 %             | 223              | 49 %             | 197               | 44 %  |                  | 0                                      | 0 %   |
|                            | NRASmt                                       | 66               | 4 %              | 37               | 4 %              | 12               | 3 %              | 17                | 4 %   |                  | 0                                      | 0 %   |
|                            | RAS&BRAFWt                                   | 548              | 29 %             | 294              | 32 %             | 113              | 25 %             | 141               | 31 %  |                  | 0                                      | 0 %   |
|                            | BRAFV600Ewt                                  | 273              | 15 %             | 93               | 10 %             | 91               | 20 %             | 89                | 20 %  |                  | 0                                      | 0 %   |
| Agegroups                  | ≤70                                          | 1074             | 57 %             | 610              | 66 %             | 200              | 44 %             | 234               | 52 %  | <0.001           | 30                                     | 61 %  |
|                            | >70                                          | 797              | 43 %             | 309              | 34 %             | 251              | 56 %             | 218               | 48 %  |                  | 19                                     | 39 %  |
| Sex                        | Male                                         | 1053             | 56 %             | 558              | 61 %             | 245              | 54 %             | 225               | 50 %  | <0.001           | 25                                     | 51 %  |
|                            | Female                                       | 818              | 44 %             | 361              | 39 %             | 206              | 46 %             | 227               | 50 %  |                  | 24                                     | 49 %  |
| Primary tumor              | Right colon                                  | 624              | 34 %             | 267              | 29 %             | 167              | 37 %             | 174               | 38 %  | <0.001           | 16                                     | 33 %  |
|                            | Left colon                                   | 619              | 33 %             | 329              | 36 %             | 117              | 26 %             | 157               | 35 %  |                  | 16                                     | 33 %  |
|                            | Rectum                                       | 612              | 33 %             | 318              | 35 %             | 164              | 37 %             | 113               | 25 %  |                  | 17                                     | 35 %  |
|                            | Multiple/unknown                             | 16               | -                | 5                | -                | 3                | -                | 8                 | -     |                  | 0                                      | -     |
| Primary surgery            | No                                           | 449              | 24 %             | 215              | 23 %             | 183              | 41 %             | 40                | 9 %   | <0.001           | 11                                     | 22 %  |
|                            | Yes                                          | 1422             | 76 %             | 704              | 77 %             | 268              | 59 %             | 412               | 91 %  |                  | 38                                     | 78 %  |
| Presentation of metastases | Synchronous                                  | 1146             | 61 %             | 622              | 68 %             | 292              | 65 %             | 205               | 45 %  | <0.001           | 28                                     | 57 %  |
|                            | Metachronous                                 | 229              | 12 %             | 297              | 32 %             | 159              | 35 %             | 247               | 55 %  |                  | 21                                     | 43 %  |
| Performance status         | 0                                            | 593              | 32 %             | 256              | 28 %             | 161              | 36 %             | 164               | 36 %  | <0.001           | 12                                     | 25 %  |
|                            | 1                                            | 815              | 44 %             | 507              | 55 %             | 141              | 32 %             | 139               | 31 %  |                  | 28                                     | 58 %  |
|                            | 2-4                                          | 457              | 25 %             | 156              | 17 %             | 145              | 32 %             | 148               | 33 %  |                  | 8                                      | 17 %  |
|                            | Missing                                      | 6                | -                | 0                | -                | 4                | -                | 1                 | -     |                  | 1                                      | -     |
| Type of treatment          | Any active treatment                         | 1593             | 85 %             | 902              | 98 %             | 354              | 79 %             | 292               | 65 %  | <0.001           | 45                                     | 92 %  |
|                            | Metastasectomy and/or LAT ± systemic therapy | 516              | 28 %             | 337              | 37 %             | 122              | 27 %             | 36                | 8 %   | <0.001           | 21                                     | 43 %  |
|                            | Systemic therapy only                        | 1077             | 58 %             | 565              | 61 %             | 232              | 51 %             | 256               | 57 %  | <0.001           | 24                                     | 49 %  |
|                            | Cytotoxics only                              | 406              | 22 %             | 94               | 10 %             | 120              | 27 %             | 185               | 41 %  | <0.001           | 7                                      | 14 %  |
|                            | Anti-VEGF/Anti-EGFR§                         | 671              | 36 %             | 471              | 51 %             | 112              | 25 %             | 71                | 16 %  | <0.001           | 17                                     | 35 %  |
|                            | Best supportive care                         | 278              | 15 %             | 17               | 2 %              | 97               | 22 %             | 160               | 35 %  | <0.001           | 4                                      | 8 %   |
| Overall survival           | Median, months (95% CI)                      | 22.1 (20.9-23.5) |                  | 30.4 (28.0-32.9) |                  | 17.7 (15.1-20.2) |                  | 11.9 (10.2-13.6)  |       | <0.001           | 31.6 (21.3-41.9)                       |       |
|                            | 1-year rate                                  | 70 %             |                  | 84 %             |                  | 62 %             |                  | 50 %              |       |                  | 76 %                                   |       |
|                            | 3-year rate                                  | 32 %             |                  | 43 %             |                  | 26 %             |                  | 14 %              |       |                  | 41 %                                   |       |
|                            | Any active treatment                         | 26.5 (24.9-28.1) |                  | 31.0 (28.5-33.5) |                  | 22.9 (20.4-25.3) |                  | 18.0 (15.4-20.6)  |       | <0.001           | 33.0 (31.1-34.8)                       |       |
|                            | Metastasectomy and/or LAT                    | 67.5 (60.7-74.3) |                  | 71.8 (61.9-81.7) |                  | 58.5 (42.9-74.1) |                  | 64.0 (19.9-108.1) |       | 0.117            | 54.5 (30.2-78.8)                       |       |
|                            | Systemic therapy only                        | 18.9 (17.8-20.1) |                  | 21.1 (19.5-22.8) |                  | 15.1 (13.4-16.7) |                  | 15.8 (14.4-17.2)  |       | <0.001           | 20.9 (13.5-28.2)                       |       |
|                            | Cytotoxics only                              | 12.4 (11.1-13.7) |                  | 13.7 (11.1-16.4) |                  | 11.0 (9.5-12.6)  |                  | 12.5 (10.2-14.8)  |       | 0.036            | 6.9 (4.4-9.3)                          |       |
| Anti-VEGF/Anti-EGFR §      | 23.5 (21.7-25.2)                             |                  | 23.2 (21.0-25.4) |                  | 20.7 (16.6-24.9) |                  | 26.9 (22.2-31.5) |                   | 0.898 | 24.7 (20.6-28.8) |                                        |       |
| Best supportive care       | 4.2 (3.5-5.0)                                |                  | 2.9 (2.1-3.7)    |                  | 4.8 (2.5-7.0)    |                  | 4.1 (3.1-5.2)    |                   | 0.170 | 3.3 (2.3-4.4)    |                                        |       |

§ systemic therapy with anti-VEGF/anti-EGFR but without metastasectomy/LAT.

\*p-value between RAXO, Uppsala region and PRCRC, § systemic therapy with anti-VEGF/anti-EGFR but without metastasectomy/LAT. The high percentage of KRAS-G12C mutations among all patients depend upon the enrichment of 49 patients with this mutation from the Finnish population cohort.

**Supplementary Table 3.** Smoking status, resection of primary tumor, blood counts, alkaline phosphatase (ALP) and carcinoembryonic antigen (CEA) per mutation group

|                   |                         | All  |       | <i>KRAS</i> -G12C mt |       | Other <i>KRAS</i> mt |       | <i>NRAS</i> mt |       | <i>RAS</i> & <i>BRAF</i> wt |       | <i>BRAF</i> V600E mt |       | P-value* |
|-------------------|-------------------------|------|-------|----------------------|-------|----------------------|-------|----------------|-------|-----------------------------|-------|----------------------|-------|----------|
|                   |                         | 1871 | 100 % | 103                  | 100 % | 881                  | 100 % | 66             | 100 % | 548                         | 100 % | 273                  | 100 % |          |
| Smoking status    | Never                   | 711  | 53 %  | 40                   | 63 %  | 341                  | 54 %  | 29             | 57 %  | 220                         | 53 %  | 81                   | 43 %  | ref      |
|                   | Ex-smoker               | 303  | 23 %  | 10                   | 16 %  | 135                  | 22 %  | 12             | 24 %  | 96                          | 23 %  | 50                   | 26 %  | 0.211    |
|                   | Smoker                  | 332  | 25 %  | 14                   | 22 %  | 153                  | 24 %  | 10             | 20 %  | 96                          | 23 %  | 59                   | 31 %  | 0.445    |
|                   | Missing                 | 525  | -     | 39                   | -     | 252                  | -     | 15             | -     | 136                         | -     | 83                   | -     | -        |
| Primary resection | No                      | 449  | 24 %  | 23                   | 22 %  | 226                  | 26 %  | 17             | 26 %  | 117                         | 21 %  | 66                   | 24 %  | ref      |
|                   | Yes                     | 1422 | 76 %  | 80                   | 78 %  | 655                  | 74 %  | 49             | 74 %  | 431                         | 79 %  | 207                  | 76 %  | 0.464    |
| Haemoglobin       | ≥11.0                   | 1232 | 83 %  | 74                   | 82 %  | 572                  | 82 %  | 47             | 84 %  | 381                         | 84 %  | 158                  | 81 %  | ref      |
|                   | <11.0                   | 258  | 17 %  | 16                   | 18 %  | 124                  | 18 %  | 9              | 16 %  | 73                          | 16 %  | 36                   | 19 %  | 0.993    |
|                   | Missing                 | 381  | -     | 13                   | -     | 185                  | -     | 10             | -     | 94                          | -     | 79                   | -     | -        |
| Histology         | Adenocarcinoma          | 1067 | 0.87  | 77                   | 0.865 | 507                  | 0.87  | 42             | 0.913 | 331                         | 0.912 | 110                  | 0.753 | ref      |
|                   | Mucinous adenocarcinoma | 160  | 0.13  | 12                   | 0.135 | 76                   | 0.13  | 4              | 0.087 | 32                          | 0.088 | 36                   | 0.247 | 0.907    |
|                   | Missing                 | 644  | -     | 14                   | -     | 298                  | -     | 20             | -     | 185                         | -     | 127                  | -     | -        |
| Leukocytes        | ≤10.0                   | 1175 | 79 %  | 73                   | 81 %  | 561                  | 81 %  | 41             | 75 %  | 364                         | 80 %  | 136                  | 70 %  | ref      |
|                   | >10.0                   | 310  | 21 %  | 17                   | 19 %  | 133                  | 19 %  | 14             | 25 %  | 89                          | 20 %  | 57                   | 30 %  | 0.950    |
|                   | Missing                 | 386  | -     | 13                   | -     | 187                  | -     | 11             | -     | 95                          | -     | 80                   | -     | -        |
| Thrombocytes      | ≤400                    | 1075 | 74 %  | 66                   | 73 %  | 501                  | 74 %  | 33             | 60 %  | 348                         | 79 %  | 127                  | 69 %  | ref      |
|                   | <400                    | 370  | 26 %  | 24                   | 27 %  | 172                  | 26 %  | 22             | 40 %  | 94                          | 21 %  | 58                   | 31 %  | 0.821    |
|                   | Missing                 | 426  | -     | 13                   | -     | 208                  | -     | 11             | -     | 106                         | -     | 88                   | -     | -        |
| ALP               | ≤ULN                    | 871  | 60 %  | 57                   | 63 %  | 415                  | 62 %  | 29             | 54 %  | 265                         | 60 %  | 105                  | 57 %  | ref      |
|                   | >ULN                    | 572  | 40 %  | 33                   | 37 %  | 256                  | 38 %  | 25             | 46 %  | 178                         | 40 %  | 80                   | 43 %  | 0.785    |
|                   | Missing                 | 428  | -     | 13                   | -     | 210                  | -     | 12             | -     | 105                         | -     | 88                   | -     | -        |
| CEA               | ≤5                      | 364  | 29 %  | 32                   | 37 %  | 162                  | 27 %  | 15             | 28 %  | 109                         | 28 %  | 46                   | 31 %  | ref      |
|                   | >5                      | 913  | 71 %  | 55                   | 63 %  | 440                  | 73 %  | 38             | 72 %  | 278                         | 72 %  | 102                  | 69 %  | 0.057    |
|                   | Missing                 | 594  | -     | 16                   | -     | 279                  | -     | 13             | -     | 161                         | -     | 125                  | -     | -        |

ULN=upper limit of normal

\*p-value between *KRAS*-G12C mt and Other *KRAS* mt

**Supplementary Table 4.** Demographics per mutation group excluding the 49 patients with *KRAS*-G12C mutations from the Finnish population-based cohort not included in the real-life RAXO study

|                            |                         | All  |         | <i>KRAS</i> -G12C mt |         | Other <i>KRAS</i> mt |         | <i>NRAS</i> mt |         | <i>RAS</i> & <i>BRAF</i> wt |         | <i>BRAF</i> V600E mt |         | p-value* |
|----------------------------|-------------------------|------|---------|----------------------|---------|----------------------|---------|----------------|---------|-----------------------------|---------|----------------------|---------|----------|
| Total                      |                         | 1822 | 100 %   | 54                   | 100 %   | 881                  | 100 %   | 66             | 100 %   | 548                         | 100 %   | 273                  | 100 %   |          |
| Median age (range)         |                         | 68   | (22-99) | 68                   | (35-86) | 69                   | (23-99) | 64             | (30-87) | 67                          | (22-95) | 70                   | (33-90) | 0.215    |
| Agegroups                  | ≤70                     | 1044 | 57 %    | 33                   | 61 %    | 484                  | 55 %    | 44             | 67 %    | 350                         | 64 %    | 137                  | 50 %    | ref      |
|                            | >70                     | 778  | 43 %    | 21                   | 39 %    | 397                  | 45 %    | 22             | 33 %    | 198                         | 36 %    | 136                  | 50 %    | 0.377    |
| Sex                        | Female                  | 794  | 44 %    | 22                   | 41 %    | 378                  | 43 %    | 28             | 42 %    | 198                         | 36 %    | 168                  | 62 %    | ref      |
|                            | Male                    | 1028 | 56 %    | 32                   | 59 %    | 503                  | 57 %    | 38             | 58 %    | 350                         | 64 %    | 105                  | 38 %    | 0.755    |
| Performance status         | 0                       | 581  | 32 %    | 15                   | 28 %    | 297                  | 34 %    | 25             | 38 %    | 176                         | 32 %    | 68                   | 25 %    | ref      |
|                            | 1                       | 787  | 43 %    | 22                   | 41 %    | 394                  | 45 %    | 31             | 47 %    | 241                         | 44 %    | 99                   | 37 %    | 0.770    |
|                            | 2-4                     | 449  | 25 %    | 17                   | 31 %    | 188                  | 21 %    | 10             | 15 %    | 130                         | 24 %    | 104                  | 38 %    | 0.112    |
|                            | Missing                 | 5    | -       | 0                    | -       | 2                    | -       | 0              | -       | 1                           | -       | 2                    | -       | -        |
| Smoking status             | Never                   | 698  | 53 %    | 27                   | 68 %    | 341                  | 54 %    | 29             | 57 %    | 220                         | 53 %    | 81                   | 43 %    | ref      |
|                            | Ex-smoker               | 299  | 23 %    | 6                    | 15 %    | 135                  | 22 %    | 12             | 24 %    | 96                          | 23 %    | 50                   | 26 %    | 0.212    |
|                            | Smoker                  | 325  | 25 %    | 7                    | 18 %    | 153                  | 24 %    | 10             | 20 %    | 96                          | 23 %    | 59                   | 31 %    | 0.208    |
|                            | Missing                 | 500  | -       | 14                   | -       | 252                  | -       | 15             | -       | 136                         | -       | 83                   | -       | -        |
| Primary tumour             | Right colon             | 608  | 34 %    | 13                   | 24 %    | 295                  | 34 %    | 9              | 14 %    | 95                          | 17 %    | 196                  | 73 %    | ref      |
|                            | Left colon              | 603  | 33 %    | 20                   | 37 %    | 266                  | 30 %    | 26             | 39 %    | 241                         | 44 %    | 50                   | 19 %    | 0.145    |
|                            | Rectum                  | 595  | 33 %    | 21                   | 39 %    | 312                  | 36 %    | 31             | 47 %    | 207                         | 38 %    | 24                   | 9 %     | 0.242    |
|                            | Multiple/unknown        | 16   | -       | 0                    | -       | 8                    | -       | 0              | -       | 5                           | -       | 3                    | -       | -        |
| Primary resection          | No                      | 438  | 24 %    | 12                   | 22 %    | 226                  | 26 %    | 17             | 26 %    | 117                         | 21 %    | 66                   | 24 %    | ref      |
|                            | Yes                     | 1384 | 76 %    | 42                   | 78 %    | 655                  | 74 %    | 49             | 74 %    | 431                         | 79 %    | 207                  | 76 %    | 0.575    |
| Differentiation            | Well/Moderate           | 1157 | 78 %    | 37                   | 86 %    | 588                  | 84 %    | 47             | 86 %    | 363                         | 81 %    | 122                  | 53 %    | ref      |
|                            | Poor/Undifferentiated   | 318  | 22 %    | 6                    | 14 %    | 111                  | 16 %    | 8              | 15 %    | 85                          | 19 %    | 108                  | 47 %    | 0.737    |
|                            | Missing                 | 347  | -       | 11                   | -       | 182                  | -       | 11             | -       | 100                         | -       | 43                   | -       | -        |
| Histology                  | Adenocarcinoma          | 1026 | 87 %    | 36                   | 88 %    | 507                  | 87 %    | 42             | 91 %    | 331                         | 91 %    | 110                  | 75 %    | ref      |
|                            | Mucinous adenocarcinoma | 153  | 13 %    | 5                    | 12 %    | 76                   | 13 %    | 4              | 9 %     | 32                          | 9 %     | 36                   | 25 %    | 0.877    |
|                            | Missing                 | 643  | -       | 13                   | -       | 298                  | -       | 20             | -       | 185                         | -       | 127                  | -       | -        |
| Presentation of metastases | Synchronous             | 1119 | 61 %    | 33                   | 61 %    | 555                  | 63 %    | 41             | 62 %    | 318                         | 58 %    | 172                  | 63 %    | ref      |
|                            | Metachronous            | 703  | 39 %    | 21                   | 39 %    | 326                  | 37 %    | 25             | 38 %    | 230                         | 42 %    | 101                  | 37 %    | 0.781    |
| Number of metastatic sites | 1                       | 890  | 49 %    | 28                   | 52 %    | 443                  | 50 %    | 31             | 47 %    | 263                         | 48 %    | 125                  | 46 %    | ref      |
|                            | 2                       | 600  | 33 %    | 18                   | 33 %    | 287                  | 33 %    | 22             | 33 %    | 178                         | 32 %    | 95                   | 35 %    | 0.980    |
|                            | 3+                      | 332  | 18 %    | 8                    | 15 %    | 151                  | 17 %    | 13             | 20 %    | 107                         | 20 %    | 53                   | 19 %    | 0.668    |
| Metastatic sites           | Liver                   | 1262 | 69 %    | 39                   | 72 %    | 615                  | 70 %    | 51             | 77 %    | 412                         | 75 %    | 145                  | 53 %    | 0.707    |
|                            | Lung                    | 566  | 31 %    | 19                   | 35 %    | 321                  | 36 %    | 22             | 33 %    | 136                         | 25 %    | 68                   | 25 %    | 0.853    |
|                            | Lymph nodes             | 486  | 27 %    | 12                   | 22 %    | 199                  | 23 %    | 18             | 27 %    | 152                         | 28 %    | 105                  | 38 %    | 0.950    |
|                            | Peritoneum              | 379  | 21 %    | 6                    | 11 %    | 169                  | 19 %    | 11             | 17 %    | 104                         | 19 %    | 89                   | 33 %    | 0.146    |
|                            | Bone                    | 68   | 4 %     | 2                    | 4 %     | 31                   | 4 %     | 2              | 3 %     | 23                          | 4 %     | 10                   | 4 %     | 0.943    |
|                            | Other                   | 248  | 14 %    | 6                    | 11 %    | 106                  | 12 %    | 9              | 14 %    | 78                          | 14 %    | 49                   | 18 %    | 0.840    |
|                            | ≥11.0                   | 1193 | 83 %    | 35                   | 83 %    | 572                  | 82 %    | 47             | 84 %    | 381                         | 84 %    | 158                  | 81 %    | ref      |
| <11.0                      | 249                     | 17 % | 7       | 17 %                 | 124     | 18 %                 | 9       | 16 %           | 73      | 16 %                        | 36      | 19 %                 | 0.850   |          |
| Missing                    | 380                     | -    | 12      | -                    | 185     | -                    | 10      | -              | 94      | -                           | 79      | -                    | -       |          |
| Leukocytes                 | ≤10.0                   | 1134 | 79 %    | 32                   | 76 %    | 561                  | 81 %    | 41             | 75 %    | 364                         | 80 %    | 136                  | 70 %    | ref      |
|                            | >10.0                   | 303  | 21 %    | 10                   | 24 %    | 133                  | 19 %    | 14             | 25 %    | 89                          | 20 %    | 57                   | 30 %    | 0.461    |
|                            | Missing                 | 385  | -       | 12                   | -       | 187                  | -       | 11             | -       | 95                          | -       | 80                   | -       | -        |
| Thrombocytes               | ≤400                    | 1040 | 74 %    | 31                   | 74 %    | 501                  | 74 %    | 33             | 60 %    | 348                         | 79 %    | 127                  | 69 %    | ref      |
|                            | <400                    | 357  | 26 %    | 11                   | 26 %    | 172                  | 26 %    | 22             | 40 %    | 94                          | 21 %    | 58                   | 31 %    | 0.927    |
|                            | Missing                 | 425  | -       | 12                   | -       | 208                  | -       | 11             | -       | 106                         | -       | 88                   | -       | -        |
| ALP                        | ≤ULN                    | 840  | 60 %    | 26                   | 62 %    | 415                  | 62 %    | 29             | 54 %    | 265                         | 60 %    | 105                  | 57 %    | ref      |
|                            | >ULN                    | 555  | 40 %    | 16                   | 38 %    | 256                  | 38 %    | 25             | 46 %    | 178                         | 40 %    | 80                   | 43 %    | 0.994    |
|                            | Missing                 | 427  | -       | 12                   | -       | 210                  | -       | 12             | -       | 105                         | -       | 88                   | -       | -        |
| CEA                        | ≤5                      | 343  | 28 %    | 11                   | 28 %    | 162                  | 27 %    | 15             | 28 %    | 109                         | 28 %    | 46                   | 31 %    | ref      |
|                            | >5                      | 886  | 72 %    | 28                   | 72 %    | 440                  | 73 %    | 38             | 72 %    | 278                         | 72 %    | 102                  | 69 %    | 0.860    |
|                            | Missing                 | 1229 | 593     | 15                   | -       | 279                  | -       | 13             | -       | 161                         | -       | 125                  | -       | -        |
| MMR-status                 | pMMR                    | 891  | 92 %    | 16                   | 94 %    | 425                  | 97 %    | 27             | 90 %    | 292                         | 98 %    | 131                  | 71 %    | ref      |
|                            | dMMR                    | 77   | 8 %     | 1                    | 6 %     | 12                   | 3 %     | 3              | 10 %    | 7                           | 2 %     | 54                   | 29 %    | 0.458    |
|                            | Missing                 | 854  | -       | 37                   | -       | 444                  | -       | 36             | -       | 249                         | -       | 88                   | -       | -        |

\*p-value between *KRAS*-G12C mt and Other *KRAS* mt, ULN=upper limit of normal

**Supplementary Table 5.** Treatment per mutation group excluding the 49 patients with *KRAS*-G12C mutations from the Finnish population-based cohort not included in the real-life RAXO study

|                             |                           | All  |       | <i>KRAS</i> -G12C mt |       | Other <i>KRAS</i> mt |       | p-value* | <i>NRAS</i> mt |       | <i>RAS</i> & <i>BRAF</i> wt |       | <i>BRAF</i> V600E mt |       |
|-----------------------------|---------------------------|------|-------|----------------------|-------|----------------------|-------|----------|----------------|-------|-----------------------------|-------|----------------------|-------|
| Total                       |                           | 1822 | 100 % | 54                   | 100 % | 881                  | 100 % |          | 66             | 100 % | 548                         | 100 % | 273                  | 100 % |
| Type of treatment           | Systemic therapy          | 1053 | 58 %  | 27                   | 50 %  | 510                  | 58 %  | ref      | 39             | 59 %  | 308                         | 56 %  | 169                  | 62 %  |
|                             | Metastasectomy and/or LAT | 495  | 27 %  | 18                   | 33 %  | 246                  | 28 %  | 0.303    | 22             | 33 %  | 180                         | 33 %  | 29                   | 11 %  |
|                             | Best supportive care      | 274  | 15 %  | 9                    | 17 %  | 125                  | 14 %  | 0.439    | 5              | 8 %   | 60                          | 11 %  | 75                   | 27 %  |
| Total chemotherapy          |                           | 1514 | 100 % | 44                   | 100 % | 743                  | 100 % |          | 59             | 100 % | 476                         | 100 % | 192                  | 100 % |
| Number of lines             | 1                         | 610  | 40 %  | 17                   | 39 %  | 291                  | 39 %  | ref      | 21             | 36 %  | 197                         | 41 %  | 84                   | 44 %  |
|                             | 2                         | 422  | 28 %  | 16                   | 36 %  | 204                  | 27 %  | 0.413    | 14             | 24 %  | 115                         | 24 %  | 73                   | 38 %  |
|                             | ≥3                        | 482  | 32 %  | 11                   | 25 %  | 248                  | 33 %  | 0.487    | 24             | 41 %  | 164                         | 34 %  | 35                   | 18 %  |
| First line chemotherapy     | 5-FU                      | 1476 | 97 %  | 43                   | 98 %  | 729                  | 98 %  | 0.855    | 57             | 97 %  | 462                         | 97 %  | 185                  | 96 %  |
|                             | Oxaliplatin               | 891  | 59 %  | 26                   | 59 %  | 453                  | 61 %  | 0.804    | 33             | 56 %  | 268                         | 56 %  | 111                  | 58 %  |
|                             | Irinotecan                | 400  | 26 %  | 12                   | 27 %  | 165                  | 22 %  | 0.435    | 17             | 29 %  | 153                         | 32 %  | 53                   | 28 %  |
|                             | Bevacizumab               | 648  | 43 %  | 25                   | 57 %  | 348                  | 47 %  | 0.200    | 33             | 56 %  | 163                         | 34 %  | 79                   | 41 %  |
|                             | anti-EGFR                 | 163  | 11 %  | 0                    | 0 %   | 12                   | 2 %   | NE       | 4              | 7 %   | 136                         | 29 %  | 11                   | 6 %   |
| Best response in first line | PR/CR/NED                 | 794  | 57 %  | 19                   | 49 %  | 368                  | 53 %  | 0.568    | 32             | 58 %  | 307                         | 68 %  | 68                   | 40 %  |
|                             | SD                        | 419  | 30 %  | 14                   | 36 %  | 238                  | 35 %  | ref      | 14             | 25 %  | 97                          | 21 %  | 56                   | 33 %  |
|                             | PD                        | 191  | 14 %  | 6                    | 15 %  | 83                   | 12 %  | "        | 9              | 16 %  | 48                          | 11 %  | 45                   | 27 %  |
|                             | Missing                   | 110  | -     | 5                    | -     | 54                   | -     | -        | 4              | -     | 24                          | -     | 23                   | -     |
| Chemotherapy all lines      | 5-FU                      | 1482 | 98 %  | 44                   | 100 % | 731                  | 98 %  | NE       | 57             | 97 %  | 463                         | 97 %  | 187                  | 97 %  |
|                             | Oxaliplatin               | 1160 | 77 %  | 34                   | 77 %  | 581                  | 78 %  | 0.948    | 47             | 80 %  | 355                         | 75 %  | 143                  | 74 %  |
|                             | Irinotecan                | 1057 | 70 %  | 30                   | 68 %  | 511                  | 69 %  | 0.934    | 46             | 78 %  | 344                         | 72 %  | 126                  | 66 %  |
|                             | Bevacizumab               | 832  | 55 %  | 31                   | 70 %  | 437                  | 59 %  | 0.130    | 37             | 63 %  | 235                         | 49 %  | 92                   | 48 %  |
|                             | anti-EGFR                 | 364  | 24 %  | 0                    | 0 %   | 36                   | 5 %   | NE       | 10             | 17 %  | 289                         | 61 %  | 29                   | 15 %  |

\*p-value between *KRAS*-G12C mt and Other *KRAS* mt, LAT=local ablative therapy, NE=No estimate

**Supplementary Figure 1.** Overall survival for *KRAS*-G12C mutation based on type of treatment

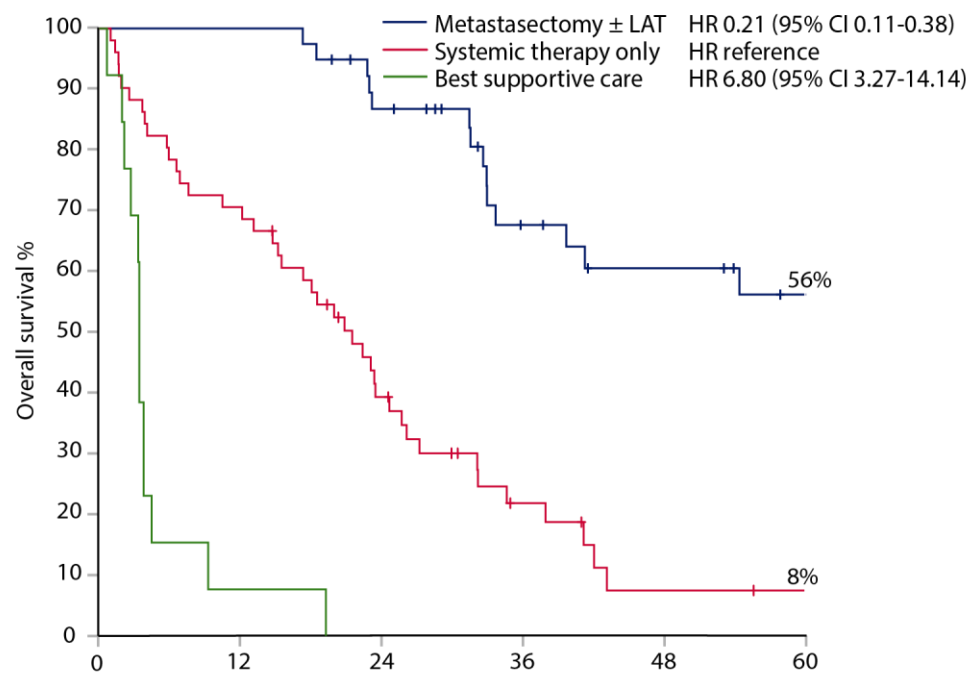

| Number at risk (censored) | 0      | 12     | 24     | 36      | 48      | 60      |
|---------------------------|--------|--------|--------|---------|---------|---------|
| Surgery and/or LAT        | 39 (0) | 39 (2) | 32 (8) | 20 (10) | 16 (13) | 12 (21) |
| Systemic therapy          | 51 (0) | 36 (3) | 18 (7) | 7 (8)   | 2 (9)   | 1 (10)  |
| Best supportive care      | 13 (0) | 1 (0)  | 0 (0)  | 0 (0)   | 0 (0)   | 0 (0)   |

**Supplementary Figure 2.** Overall survival per group of mutation excluding the 49 patients with a *KRAS*-G12C mutated tumor from the Finnish population cohort: all patients (A), systemic therapy only (B), metastasectomy and/or local ablative therapy (C) and best supportive care (D)

A

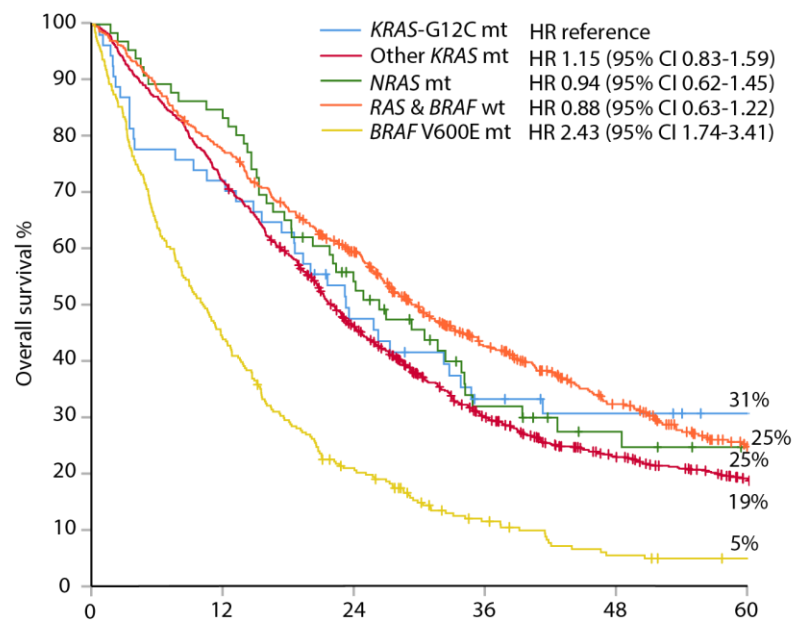

|                             | Time from mCRC diagnosis (months) |          |          |          |           |          |
|-----------------------------|-----------------------------------|----------|----------|----------|-----------|----------|
| Number at risk (censored)   | 0                                 | 12       | 24       | 36       | 48        | 60       |
| <i>KRAS</i> -G12C mt        | 54 (0)                            | 39 (2)   | 24 (4)   | 15 (6)   | 12 (9)    | 9 (15)   |
| Other <i>KRAS</i> mt        | 881 (0)                           | 635 (21) | 389 (61) | 221 (94) | 140 (123) | 89 (181) |
| <i>NRAS</i> mt              | 66 (0)                            | 55 (3)   | 33 (8)   | 16 (12)  | 10 (15)   | 6 (20)   |
| <i>RAS</i> & <i>BRAF</i> wt | 548 (1)                           | 424 (18) | 310 (61) | 185 (90) | 116 (124) | 59 (168) |
| <i>BRAF</i> V600E mt        | 273 (0)                           | 120 (4)  | 54 (13)  | 23 (15)  | 10 (18)   | 6 (21)   |

B

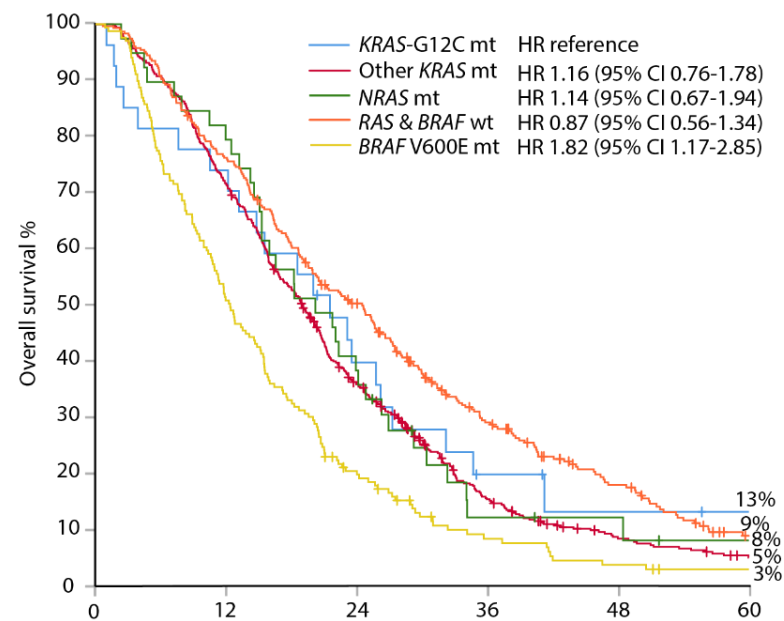

|                             | Time from mCRC diagnosis (months) |          |          |         |         |         |
|-----------------------------|-----------------------------------|----------|----------|---------|---------|---------|
| Number at risk (censored)   | 0                                 | 12       | 24       | 36      | 48      | 60      |
| <i>KRAS</i> -G12C mt        | 27 (0)                            | 20 (1)   | 10 (2)   | 4 (3)   | 2 (4)   | 1 (5)   |
| Other <i>KRAS</i> mt        | 510 (0)                           | 365 (11) | 175 (28) | 66 (38) | 29 (42) | 14 (52) |
| <i>NRAS</i> mt              | 39 (0)                            | 31 (0)   | 15 (2)   | 4 (3)   | 3 (4)   | 1 (4)   |
| <i>RAS</i> & <i>BRAF</i> wt | 308 (1)                           | 234 (7)  | 149 (21) | 76 (32) | 39 (40) | 13 (48) |
| <i>BRAF</i> V600E mt        | 169 (0)                           | 86 (3)   | 32 (7)   | 11 (7)  | 5 (9)   | 2 (10)  |

C

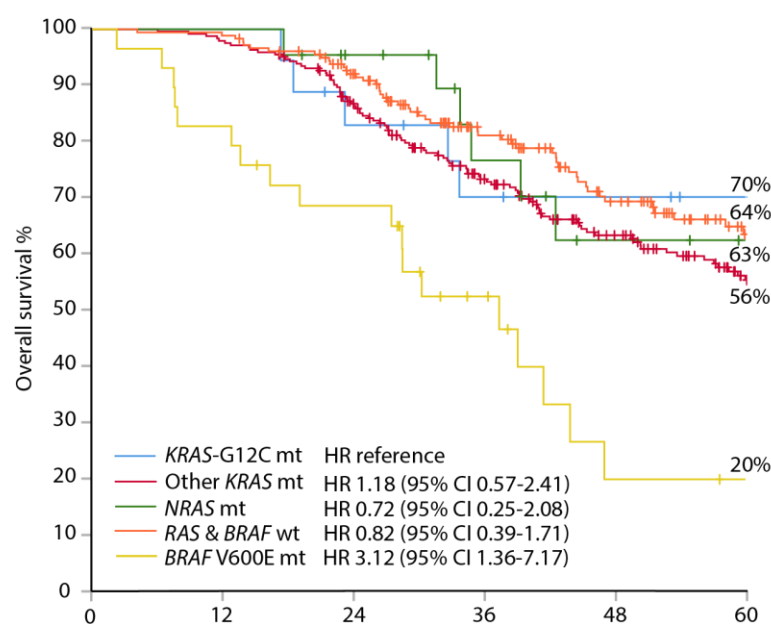

|                             | Time from mCRC diagnosis (months) |          |          |          |          |          |
|-----------------------------|-----------------------------------|----------|----------|----------|----------|----------|
| Number at risk (censored)   | 0                                 | 12       | 24       | 36       | 48       | 60       |
| <i>KRAS</i> -G12C mt        | 18 (0)                            | 18 (1)   | 14 (2)   | 11 (3)   | 10 (5)   | 8 (10)   |
| Other <i>KRAS</i> mt        | 246 (0)                           | 241 (10) | 204 (33) | 151 (56) | 109 (81) | 73 (128) |
| <i>NRAS</i> mt              | 22 (0)                            | 22 (3)   | 18 (6)   | 12 (9)   | 7 (11)   | 5 (16)   |
| <i>RAS</i> & <i>BRAF</i> wt | 180 (0)                           | 178 (11) | 155 (40) | 109 (58) | 77 (84)  | 46 (120) |
| <i>BRAF</i> V600E mt        | 29 (0)                            | 24 (1)   | 19 (6)   | 10 (8)   | 3 (9)    | 2 (10)   |

D

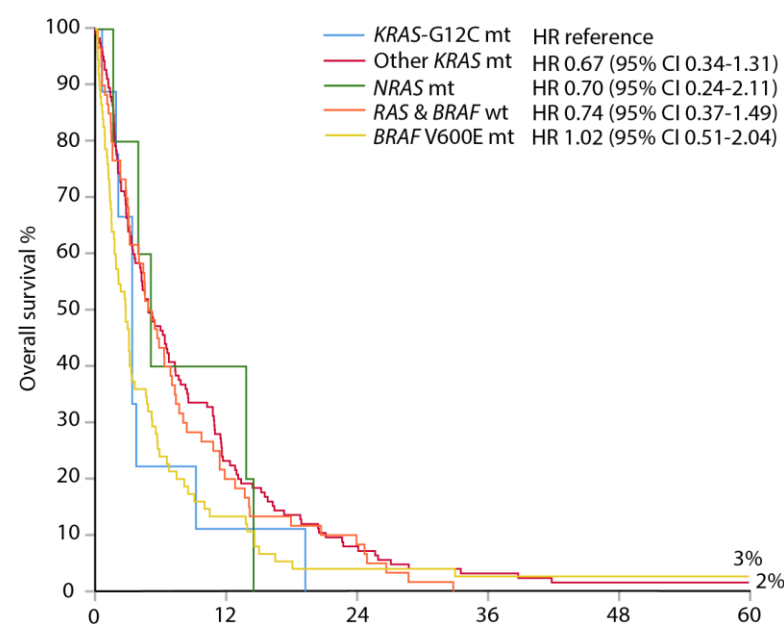

|                             | Time from mCRC diagnosis (months) |        |        |       |       |       |
|-----------------------------|-----------------------------------|--------|--------|-------|-------|-------|
| Number at risk (censored)   | 0                                 | 12     | 24     | 36    | 48    | 60    |
| <i>KRAS</i> -G12C mt        | 9 (0)                             | 1 (0)  | 0 (0)  | 0 (0) | 0 (0) | 0 (0) |
| Other <i>KRAS</i> mt        | 125 (0)                           | 29 (0) | 10 (0) | 4 (0) | 2 (0) | 2 (1) |
| <i>NRAS</i> mt              | 5 (0)                             | 2 (0)  | 0 (0)  | 0 (0) | 0 (0) | 0 (0) |
| <i>RAS</i> & <i>BRAF</i> wt | 60 (0)                            | 12 (0) | 6 (0)  | 0 (0) | 0 (0) | 0 (0) |
| <i>BRAF</i> V600E mt        | 75 (0)                            | 10 (0) | 3 (0)  | 2 (0) | 2 (0) | 2 (1) |

**Supplementary Figure 3.** Progression-free survival per group of mutation in patients treated with systemic therapy in all patients (A) and excluding the 49 patients with a *KRAS*-G12C mutated tumor from the Finnish population-based cohort (B)

A

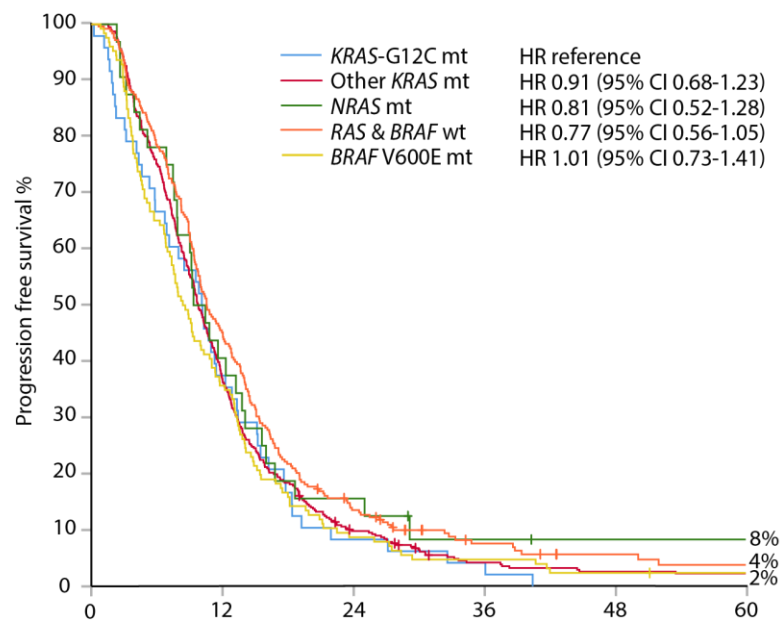

|                             | Number at risk (censored) |         |         |         |        |        |
|-----------------------------|---------------------------|---------|---------|---------|--------|--------|
|                             | 0                         | 12      | 24      | 36      | 48     | 60     |
| <i>KRAS</i> -G12C mt        | 48 (0)                    | 18 (0)  | 4 (0)   | 2 (0)   | 0 (0)  | 0 (0)  |
| Other <i>KRAS</i> mt        | 391 (0)                   | 145 (3) | 36 (7)  | 13 (7)  | 8 (7)  | 7 (13) |
| <i>NRAS</i> mt              | 32 (0)                    | 13 (0)  | 5 (1)   | 2 (2)   | 1 (2)  | 1 (2)  |
| <i>RAS</i> & <i>BRAF</i> wt | 248 (0)                   | 112 (2) | 32 (10) | 12 (13) | 6 (13) | 4 (17) |
| <i>BRAF</i> V600E mt        | 126 (0)                   | 45 (0)  | 11 (0)  | 6 (0)   | 3 (1)  | 2 (2)  |

B

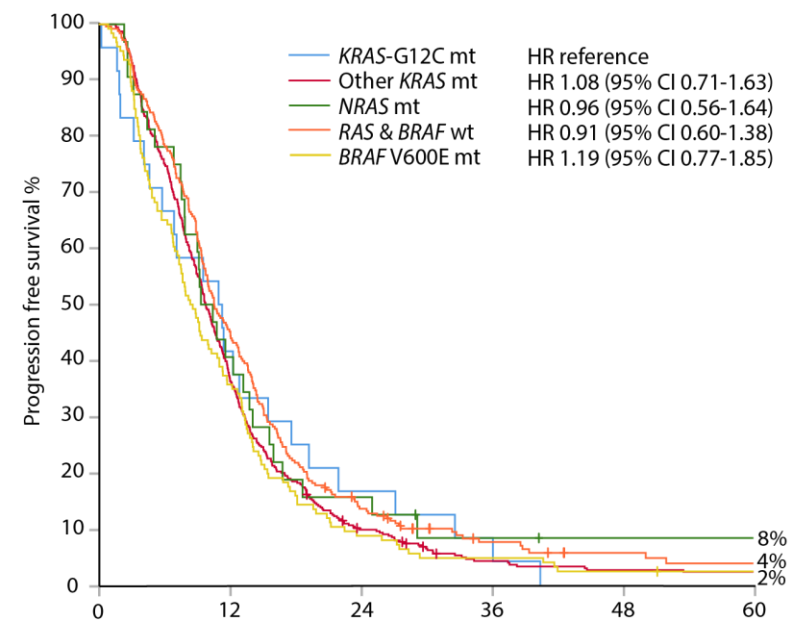

|                             | Number at risk (censored) |         |         |         |        |        |
|-----------------------------|---------------------------|---------|---------|---------|--------|--------|
|                             | 0                         | 12      | 24      | 36      | 48     | 60     |
| <i>KRAS</i> -G12C mt        | 24 (0)                    | 10 (0)  | 4 (0)   | 2 (0)   | 0 (0)  | 0 (0)  |
| Other <i>KRAS</i> mt        | 391 (0)                   | 145 (3) | 36 (7)  | 13 (7)  | 8 (7)  | 7 (13) |
| <i>NRAS</i> mt              | 32 (0)                    | 13 (0)  | 5 (1)   | 2 (2)   | 1 (2)  | 1 (2)  |
| <i>RAS</i> & <i>BRAF</i> wt | 248 (0)                   | 112 (2) | 32 (10) | 12 (13) | 6 (13) | 4 (17) |
| <i>BRAF</i> V600E mt        | 126 (0)                   | 45 (0)  | 11 (0)  | 6 (0)   | 3 (1)  | 2 (2)  |
